# Supplementary material
Source: PubMed Central journal article supplement (PMC1768528)
Supplement: heart_90_11_1352__1.pdf [file heart_90_11_1352__1.pdf]

## Web-only References

1. Fox K, Goodman G, Klein W, *et al.* Management of acute coronary syndromes. Variations in practice and outcome. GRACE Study. *Eur Heart J* 2002;**23**:1177–89.
2. Pfeffer M, Braunwald E. Ventricular remodeling after myocardial infarction: experimental observations and clinical implications. *Circulation* 1990;**81**:1161–72.
3. Davies MJ, Woolf N, Robertson W. Pathology of acute myocardial infarction with particular reference to occlusive coronary thrombi. *Br Heart J* 1976;**38**:659–64.
4. Reimer K, Lowe J, Rasmussen M, *et al.* The wavefront phenomenon of ischaemic cell death. Myocardial infarct size versus duration of coronary occlusion in dogs. *Circulation* 1977;**56**:786–94.
5. de Lemos JA, Antman EM, Gibson CM, *et al.* Abciximab improves both epicardial flow and myocardial reperfusion in ST elevation myocardial infarction. *Circulation* 2000;**101**:239–243.
6. Zahn R, Schiele R, Seidl K, *et al.* Spectrum of reperfusion strategies and factors influencing the use of primary angioplasty in patients with acute myocardial infarction admitted to hospitals with the facilities to primary angioplasty. *Heart* 1999;**82**:420–5.
7. Lamfers EJ, Hooghoudt TE, Hertzberger DP, *et al.* Abortion of acute ST segment elevation myocardial infarction after reperfusion: incidence, patients' characteristics, and prognosis. *Heart* 2003;**89**:496–501.
8. Luepker RV, Raczynski JM, Osganian S, *et al.* Effect of a community intervention on patient delay and emergency medical service use in acute coronary heart disease. *JAMA* 2000;**284**:60–67.
9. Dauerman H, Sobel B. Synergistic treatment of ST-segment elevation myocardial infarction with pharmacoinvasive recanalisation. *J Am Coll Cardiol* 2003;**42**:646–51.
10. Simoons ML, Maggioni AP, Knatterud G, *et al.* Individual risk assessment for intracranial haemorrhage during thrombolytic therapy. *Lancet* 1993;**342**:1523–8.
11. National Heart Attack Alert Program. Access to timely and optimal care for patients with acute coronary syndromes – community planning considerations: a report by the National Heart Attack Alert Program. *J Thromb Thrombolysis* 1998;**6**:19–36.
12. Suryapranata H, van't Hof AW, Hoorntje JC, *et al.* Randomised comparison of coronary stenting with balloon angioplasty in selected patients with acute myocardial infarction. *Circulation* 1998;**97**:2502–5.
13. Topol E, Neumann FJ, Montalescot G. A preferred reperfusion strategy for acute myocardial infarction. *J Am Coll Cardiol* 2003;**42**:1886–89.
14. The GUSTO Angiographic Investigators. The effects of tissue plasminogen activator, streptokinase, or both on coronary patency, ventricular function, and survival after acute myocardial infarction. *N Engl J Med* 1993;**329**:1615–1622.
15. Cannon CP, Gibson CM, Lambrew CT, *et al.* Relationship of symptom –to-balloon time and door-to-balloon time with mortality in patients undergoing angioplasty for acute myocardial infarction. *JAMA* 2000;**283**:2941–7.
16. Zijlstra F, Patel A, Jones M, *et al.* Clinical characteristics and outcome of patients with early (<2♣h), intermediate (2–4♣h) and late (>4♣h) presentation treated by primary coronary angioplasty or thrombolytic therapy for acute myocardial infarction. *Eur Heart J* 2002;**23**:550–7.
17. Nallamothu BK, Bates ER. Percutaneous coronary intervention versus fibrinolytic therapy in acute myocardial infarction: is timing (almost) everything? *Am J Cardiol* 2003;**42**:824–826.

18. Berger PB, Ellis SG, Holmes DR Jr, *et al.* Relationship between delay in performing direct coronary angioplasty and early clinical outcome in patients with acute myocardial infarction: results from the GUSTO-IIb trial. *Circulation* 1999;**100**:14–20.
19. Lieu TA, Lundstrom RJ, Ray Th, *et al.* Initial cost of primary angioplasty for acute myocardial infarction. *J Am Coll Cardiol* 1996;**28**:882–9.
20. Hochman J, Sleeper L, Webb J, *et al.* Early revascularization in acute myocardial infarction complicated by cardiogenic shock. *N Engl J Med* 1999;**341**:625–34.
21. De Boer MJ, Ottevanger JP, van t' Hoff AW, *et al.* Reperfusion therapy in elderly patients with acute myocardial infarction: a randomised comparison of primary angioplasty and thrombolytic therapy. *J Am Coll Cardiol* 2002;**39**:1723–8.
22. Grines CL, Westerhausen DR, Grines LL, *et al.* A randomised trial of transfer for primary angioplasty versus on-site thrombolysis in patients with high risk myocardial infarction. *J Am Coll Cardiol* 2002;**39**:1713–9.
23. Simoons M, Arnold A. Tailored thrombolytic therapy. *Circulation* 1993;**88**:2556–64.
24. Giugliano RP, Braunwald E. Selecting the best reperfusion strategy in ST-elevation myocardial infarction. It's all a matter of time. *Circulation* 2003;**108**:2828–30.
25. Topol EJ. Current status and future prospects for acute myocardial infarction therapy. *Circulation* 2003;**108**(suppl III):III-6–III-13.
